# Supplementary material
Source: PubMed Central journal article supplement (PMC8617353)
Supplement: mmc1.pdf [file mmc1.pdf]

**Cell Reports, Volume 37**

**Supplemental information**

**Contribution of autophagy machinery factors to  
HCV and SARS-CoV-2 replication organelle formation**

**Woan-Ing Twu, Ji-Young Lee, Heeyoung Kim, Vibhu Prasad, Berati Cerikan, Uta Haselmann, Keisuke Tabata, and Ralf Bartenschlager**

1 **Supplemental Information**

2

3

4 **Contribution of autophagy machinery factors to HCV and SARS-CoV-2**  
5 **replication organelle formation**

6

7 Woan-Ing Twu, Ji-Young Lee, Heeyoung Kim, Vibhu Prasad, Berati Cerikan, Uta

8 Haselmann, Keisuke Tabata and Ralf Bartenschlager

9

10

11 **Figure S1**

A

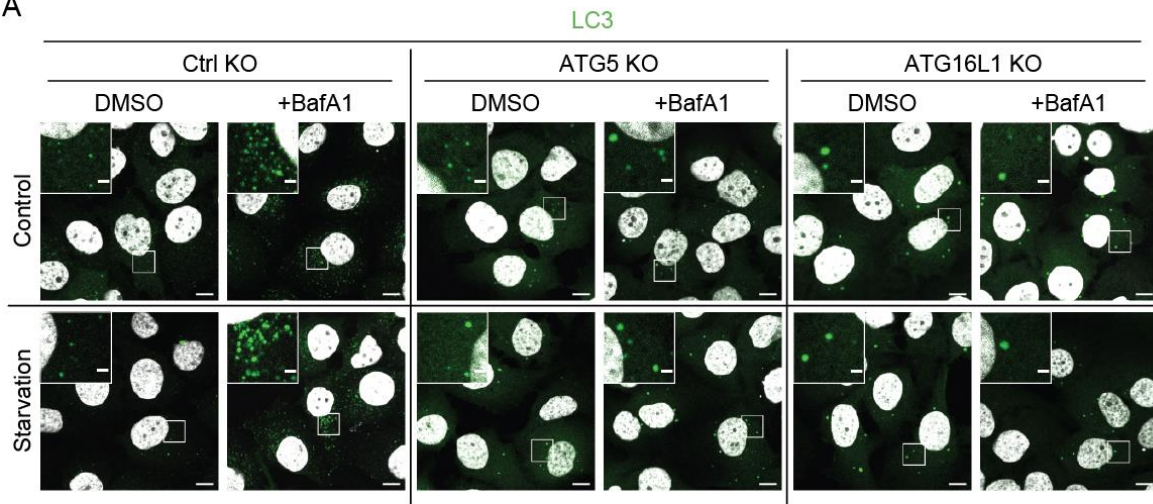

B

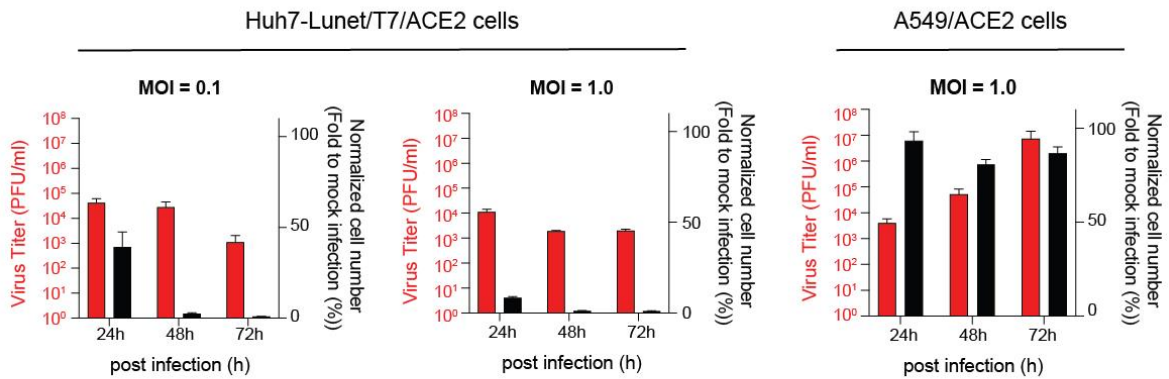

C

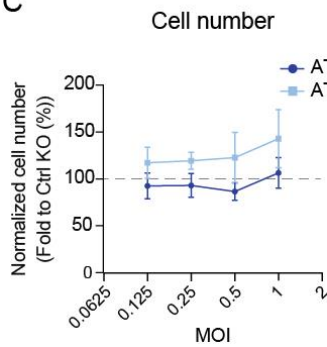

D

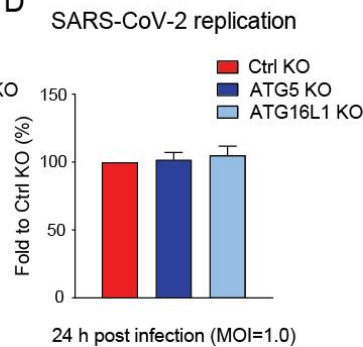

E

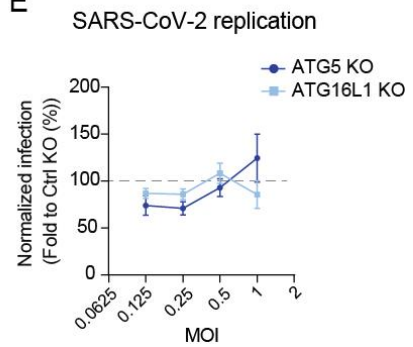

12

13

14 **Figure S1. Functional validation of AGT5 and ATG16L1 KO and replication of**  
 15 **SARS-CoV-2 in different cell lines including KO cell pools.** Related to Figure 1.

16 (A) Huh7-Lunet/T7 cells with ATG5 or ATG16L1 KO were subjected to starvation or  
 17 cultured under regular conditions and treated or not with 100 nM Bafilomycin A1  
 18 (BafA1) for 2 h prior to fixation. Fixed cells were stained for LC3. Upper-left inserts  
 19 show magnifications of white boxed areas in each image. Scale bar for overview

20 image, 10  $\mu\text{m}$ ; for magnified image, 2  $\mu\text{m}$ . Quantification of a larger set of images is  
21 given in Figure 1E. (B) Replication kinetics of SARS-CoV-2 in Huh7-Lunet/T7/ACE2  
22 and A549/ACE2 cells after infection at different MOIs. Titers of infectious virus were  
23 determined by plaque assay and cell numbers were analyzed by DAPI staining  
24 followed by CellProfiler image analysis. Data represent mean  $\pm$  SEM from two  
25 independent experiments. (C-E) Huh7-Lunet/T7/ACE2 cells with given ATG KO or  
26 control KO cells were infected with SARS-CoV-2 at indicated MOI. (C) Total cell  
27 numbers (minimum 5,000 cells per sample) were analyzed by DAPI staining  
28 followed by CellProfiler image analysis at 24 h post-infection. Values were  
29 normalized to those of infected control KO cells (set to 100% as indicated with the  
30 dotted horizontal line). Data represent mean  $\pm$  SEM from two independent  
31 experiments. (D) Cells were infected as in panel (C) at MOI = 1. After 24 h, virus  
32 replication was determined by measuring the amount of SARS-CoV-2 nucleocapsid  
33 protein using immunostaining. Data represent mean  $\pm$  SEM from three independent  
34 experiments. (E) Cells were infected with SARS-CoV-2 at MOIs specified on the  
35 bottom and fixed 16 h later. Virus replication was determined using nucleocapsid  
36 protein (N) staining and the percentage of N-positive cells was determined using the  
37 CellProfiler image analysis software package. Percentage infection for ATG5 or  
38 ATG16L1 KO cells was calculated by normalization of values to those obtained with  
39 control KO cells. Normalized data from 3 biologically independent experiments are  
40 plotted. Data represent mean  $\pm$  SEM from two independent experiments.

41

42 **Figure S2**

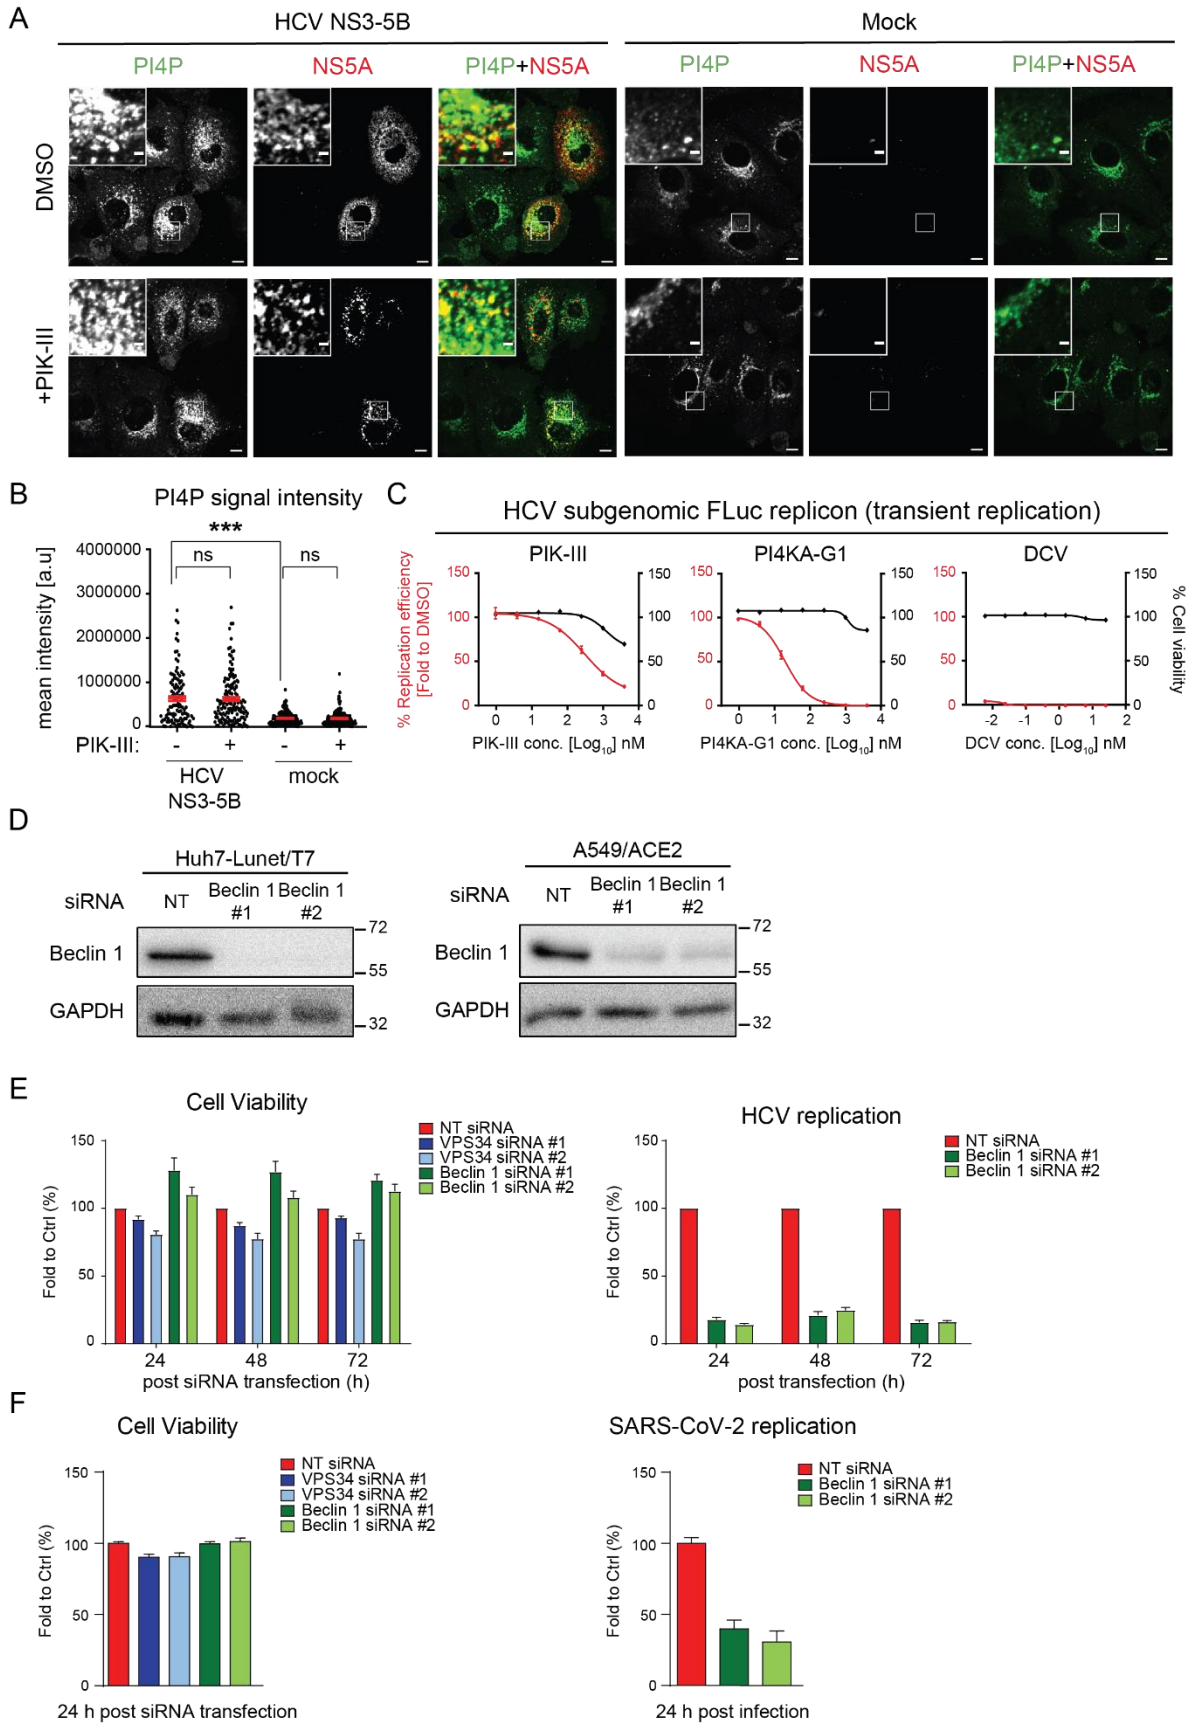

43

44

45 **Figure S2. Evaluation of knockdown of the PI3K core components VPS34 and**  
46 **Beclin1 and impairment of HCV and SARS-CoV-2 replication upon Beclin1**  
47 **depletion.** Related to Figure 2.

48 (A-B) Pharmacological inhibition of PI3K does not affect PI4P levels. Huh7-Lunet/T7  
49 cells were transfected with the HCV NS3-5B expression construct and on the next  
50 day treated with DMSO or 1  $\mu$ M PIK-III for 2 h. Fixed cells were stained with PI4P-  
51 and NS5A-specific antibodies. (A) Upper-left inserts show magnifications of white  
52 boxed areas in each image. Scale bar for overview image, 10  $\mu$ m; for magnified  
53 image, 2  $\mu$ m. (B) Quantification of PI4P puncta. At least 80 cells were analyzed in  
54 each sample by using the “Analyzed Particles” function in ImageJ. Data represent  
55 mean  $\pm$  SEM from two independent experiments. \*\*\* $p$ <0.001; ns, non-significant. (C)  
56 Huh7-Lunet/T7 cells were transfected with a subgenomic HCV reporter replicon.  
57 After 4 h, cells were treated with different concentrations of drugs given on the top of  
58 each panel. Luciferase activity reflecting HCV replication efficiency and cell viability  
59 were measured at 24 h post-transfection. DCV, Daclatasvir. (D) Beclin 1 depletion by  
60 KD in Huh7-Lunet/T7 and A549/ACE2 cells was determined by western blotting.  
61 GAPDH served as loading control. (E) Left panel: Effect of VPS34 (corresponding to  
62 Figure 2C) and Beclin 1 KD on viability of Huh7-Lunet/T7 cells as determined by  
63 Celltiter Glo assay (measuring ATP content) 24, 48, and 72 h after the last siRNA  
64 transfection. Right panel: Luciferase activity reflecting HCV RNA replication was  
65 measured 24, 48, and 72 h post HCV replicon RNA transfection. (F) Left panel:  
66 Effect of VPS34 (corresponding to Figure 2G) and Beclin 1 KD on viability of  
67 A549/ACE2 cells (measuring ATP content) was determined 24 h after the last siRNA  
68 transfection. Right panel: Percentage of SARS-CoV-2 replication was determined by  
69 N-protein specific immune-staining 24 h post-infection. Data in (C), (E), and (F)  
70 represent the mean  $\pm$  SEM from three independent experiments.

71

72 **Figure S3**

73

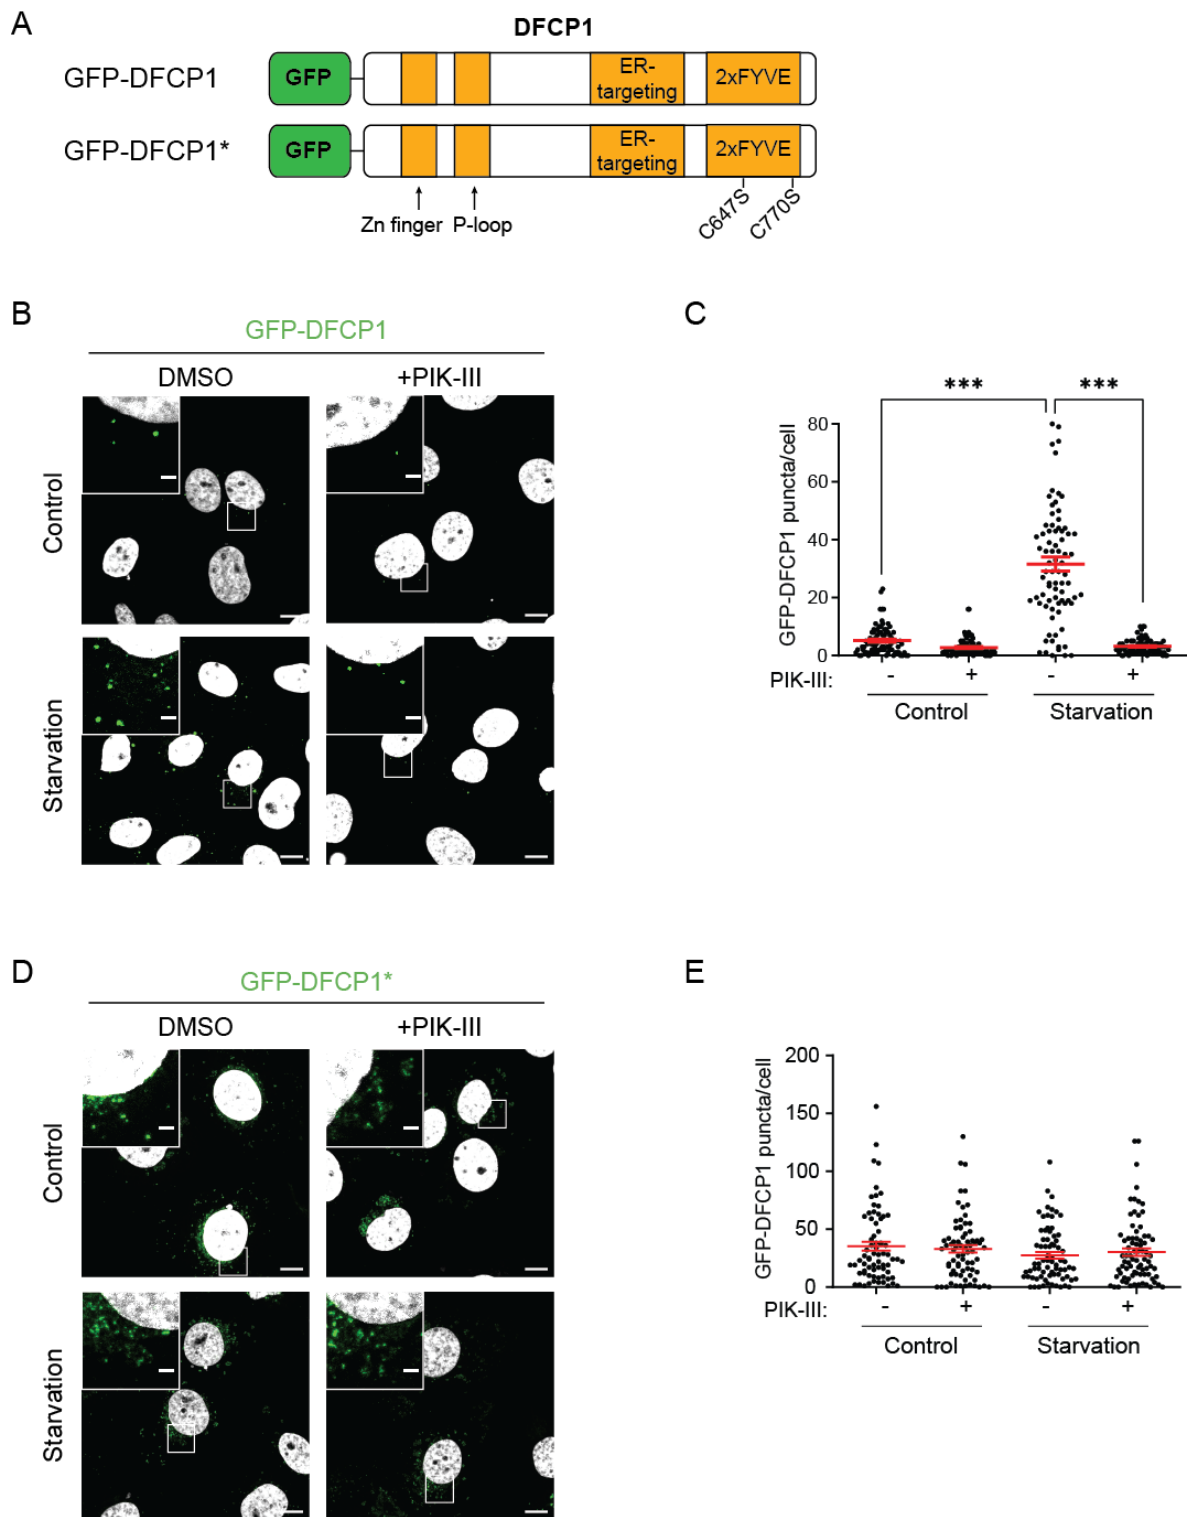

74

75

76

77

78 **Figure S3. Generation and validation of the intracellular PI3P sensor**  
79 **GFP-DFCP1.** Related to Figure 3.  
80 (A) Schematic depiction of the GFP-DFCP1 and GFP-DFCP1\* (mutant) probes. The  
81 latter contains the two given amino acid substitutions disrupting PI3P binding (Axe et  
82 al., 2008). (B, C) Huh7-Lunet/T7 cell pools stably expressing GFP-DFCP1 were  
83 subjected to starvation or cultured under normal conditions (control) and treated or  
84 not with 1  $\mu$ M PIK-III for 2 h. (B) Representative confocal microscopy images  
85 showing the subcellular distribution of GFP-DFCP1. Upper-left inserts show  
86 magnifications of white boxed areas. (C) Quantification of GFP-DFCP1 puncta. At  
87 least 80 cells were analyzed for each condition. (D, E) Huh7-Lunet/T7 cells stably  
88 expressing the sensor mutant GFP-DFCP1\* were treated and analyzed as  
89 described for (B) and (C). Scale bar for overview image, 10  $\mu$ m; for magnified image,  
90 2  $\mu$ m. All data represent mean  $\pm$  SEM from three independent experiments.  
91 \*\*\* $p < 0.001$ .  
92



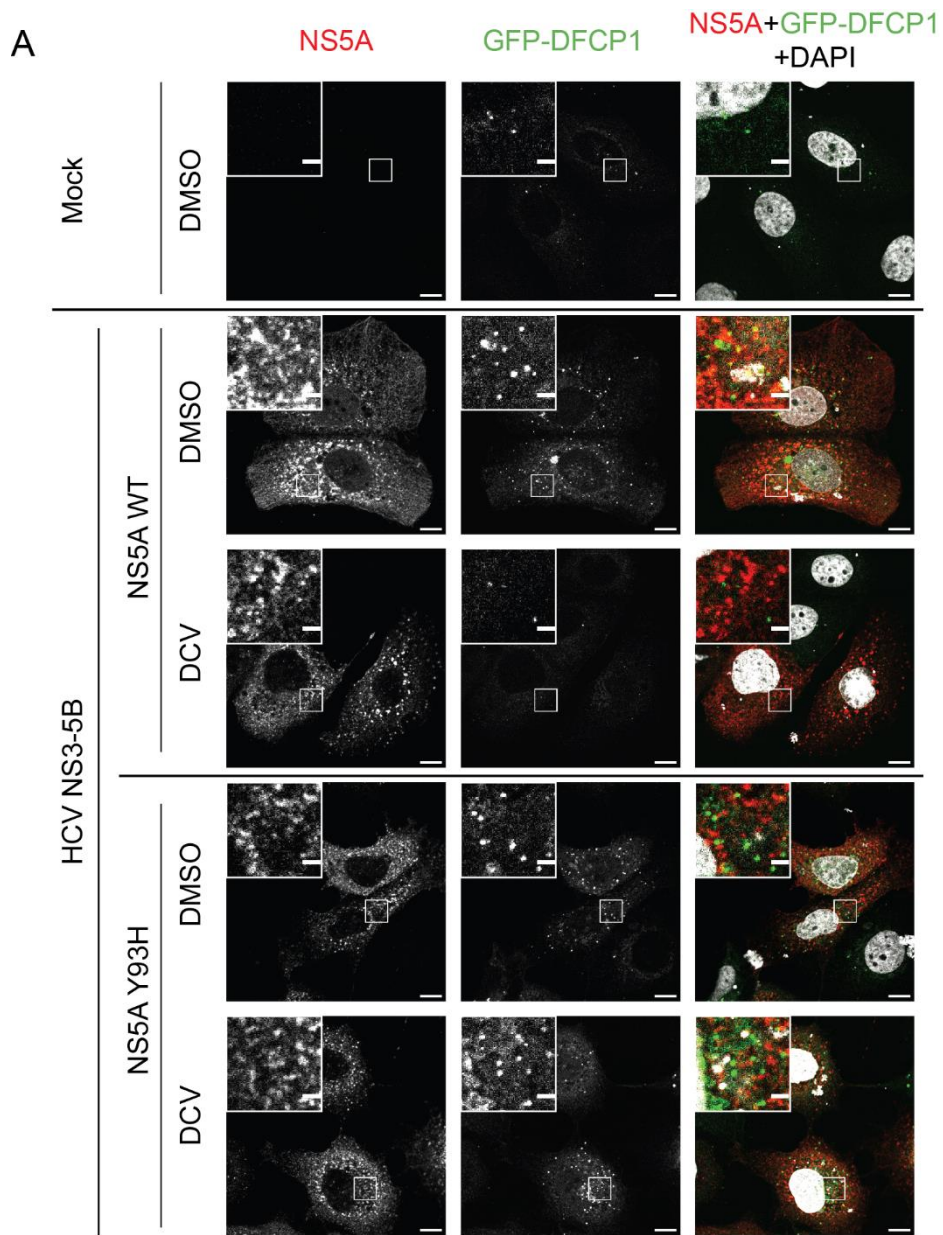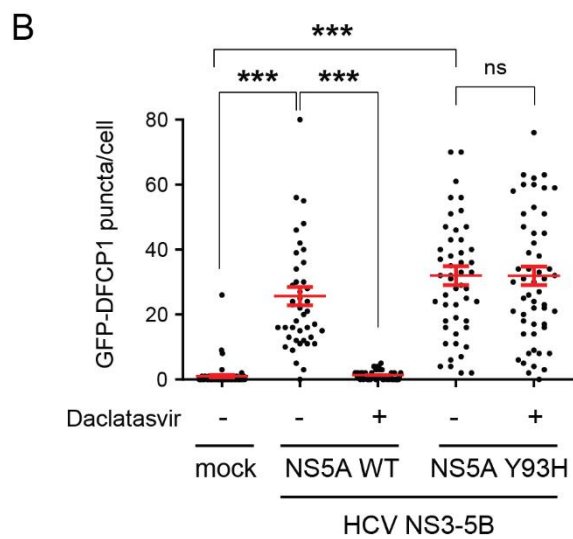

94 **Figure S4. NS5A is required for HCV NS3-5B induced increase of PI3P.** Related  
95 to Figure 3.

96 Huh7-Lunet/T7 cells stably expressing GFP-DFCP1 were transfected with the HCV  
97 NS3-5B expression plasmid encoding either NS5A wildtype (WT) or NS5A Y93H, a  
98 mutation conferring high-level resistance to the NS5A inhibitor Daclatasvir (DCV).  
99 After 5 h, cells were treated with 1 nM DCV and cells were fixed 24 h after  
100 transfection. (A) Representative confocal microscopy images showing the  
101 subcellular distribution of GFP-DFCP1 and NS5A. Upper-left inserts show  
102 magnifications of white boxed areas. (B) Quantification of GFP-DFCP1 puncta. At  
103 least 50 cells were analyzed for each condition. Scale bar for overview image, 10  
104  $\mu\text{m}$ ; for magnified image, 2  $\mu\text{m}$ . Data represent mean  $\pm$  SEM from two independent  
105 experiments. \*\*\* $p < 0.001$ ; ns, no significant.

106

107 **Figure S5**

108

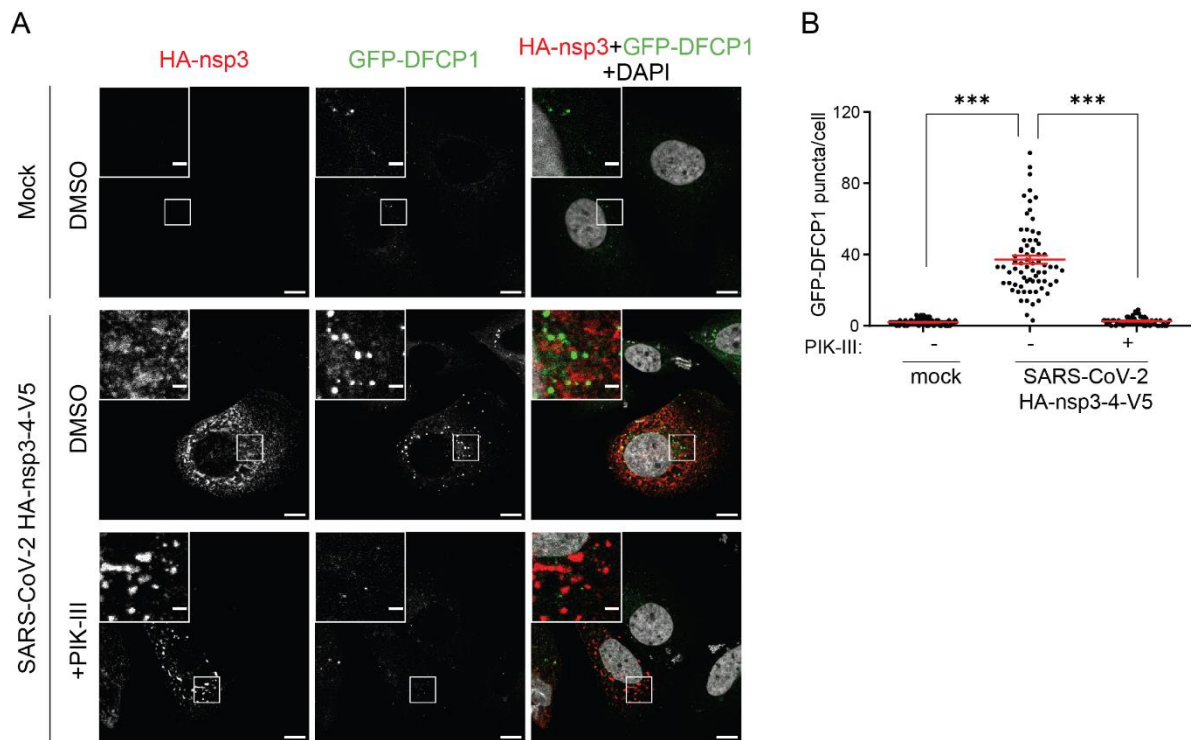

109

110

111 **Figure S5. SARS-CoV-2 nsp3-4 expression increases intracellular PI3P levels.**

112 Related to Figure 3.

113 Huh7-Lunet/T7 cells stably expressing GFP-DFCP1 were transfected with the  
114 SARS-CoV-2 HA-nsp3-4-V5 expression construct to induce the formation of DMVs.

115 After 24 h, cells were treated with 1  $\mu$ M PIK-III for 2 h prior to fixation. (A)

116 Representative confocal microscopy images showing the subcellular distribution of  
117 GFP-DFCP1 and SARS-CoV-2 HA-nsp3. Upper-left inserts show magnifications of

118 white boxed areas. (B) Quantification of GFP-DFCP1 puncta. At least 60 cells were  
119 analyzed for each condition. Scale bars for overview images, 10  $\mu$ m; for magnified

120 images, 2  $\mu$ m. Data represent mean  $\pm$  SEM from two independent experiments.

121 \*\*\* $p < 0.001$ .

122

123

124

125

126

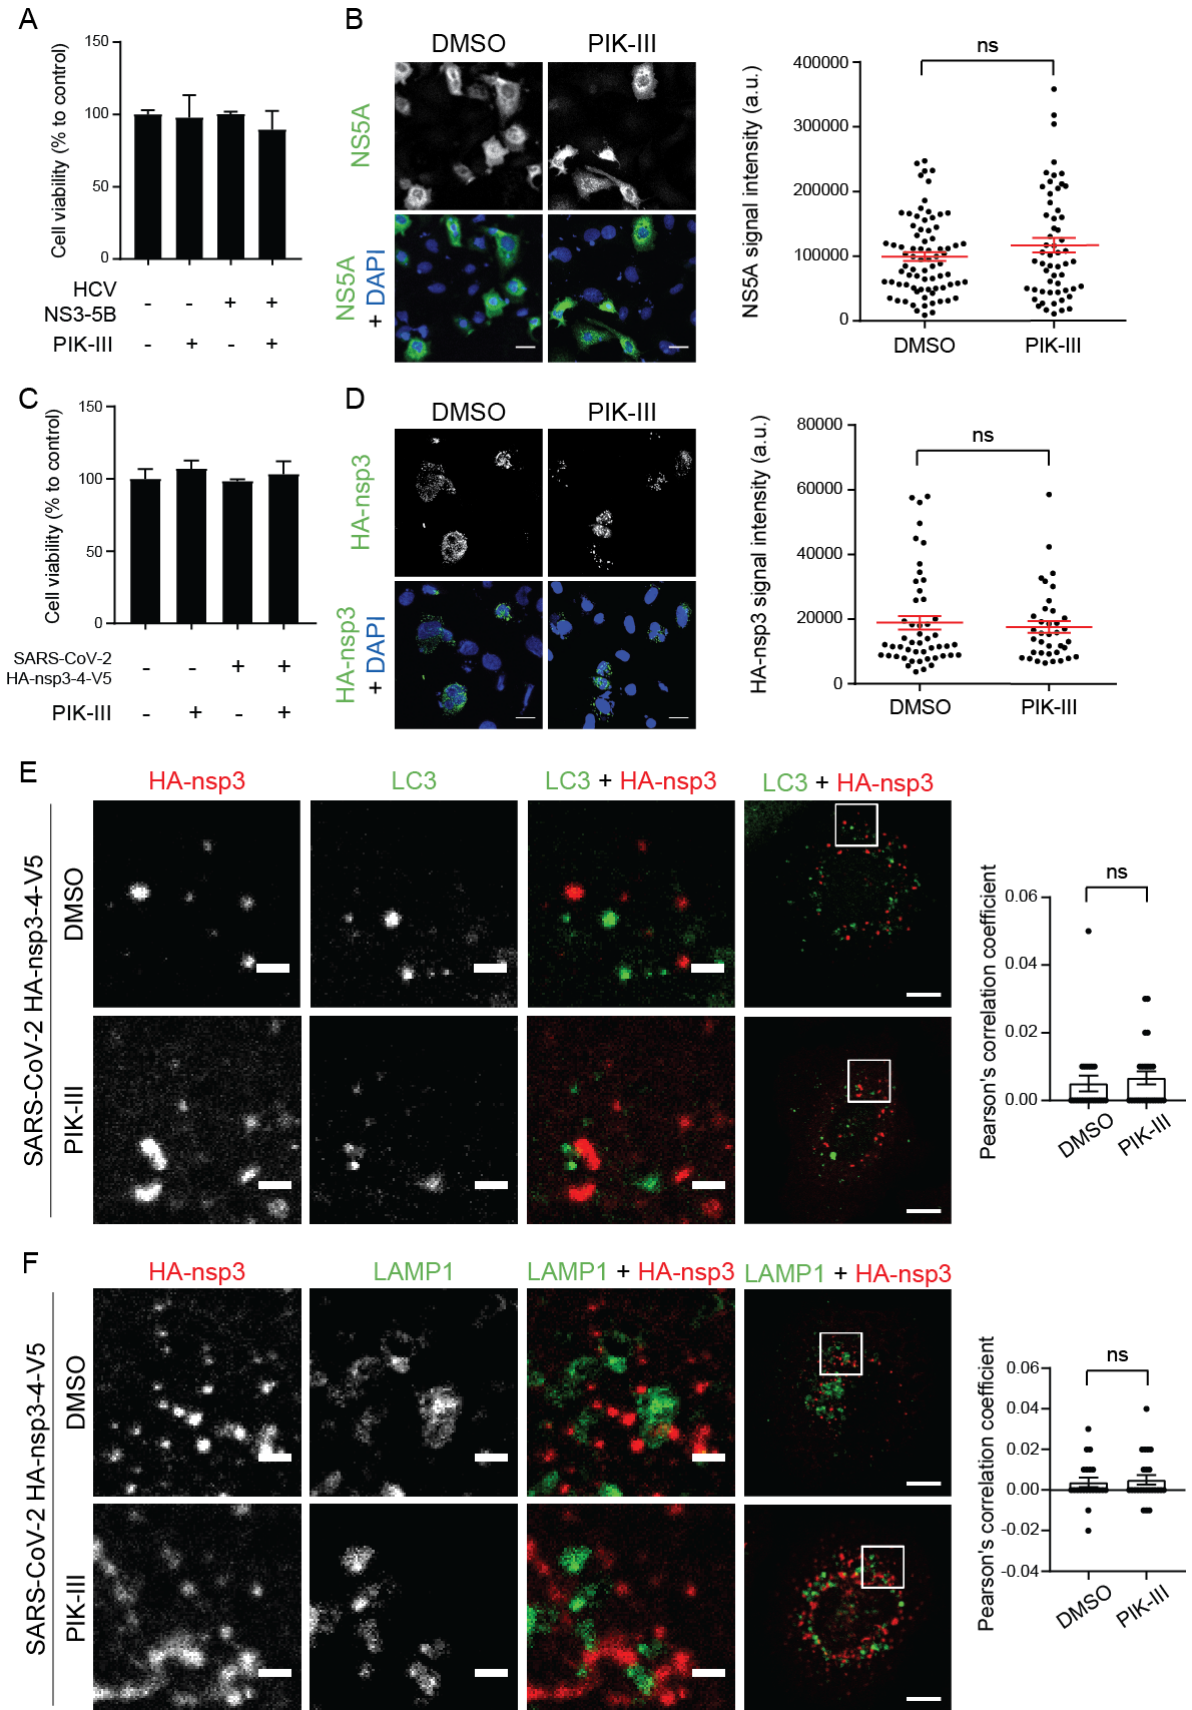

130 **Figure S6. No evidence for enhanced degradation of HCV NS3-5B and**  
131 **SARS-CoV-2 nsp3-4 upon pharmacological inhibition of PI3K.** Related to Figure  
132 4.

133 (A-B) Huh7-Lunet/T7 cells were transfected with the HCV NS3-5B expression  
134 plasmid. After 5 h, 1  $\mu$ M PIK-III was added to the cells that were lysed or fixed 24 h  
135 after transfection to measure cell viability or NS5A, respectively. (A) Cell viability was  
136 determined using WST-1 assay. Data represent mean  $\pm$  SEM from two independent  
137 experiments. (B) Fixed cells were stained for NS5A and nuclear DNA was stained  
138 with DAPI. NS5A signal intensity from 5 randomly selected areas was quantified by  
139 using ImageJ. Scale bar, 30  $\mu$ m. (C-F) Huh7-Lunet/T7 cells were transfected with  
140 the SARS-CoV-2 HA-nsp3-4-V5 expression plasmid and 24 h later, 1  $\mu$ M PIK-III was  
141 added to the cells. After 48 h, cells were lysed or fixed for further analysis. (C) Cell  
142 viability was determined by using WST-1 assay. (D) Fixed cells were stained for  
143 HA-nsp3 by using a HA-specific antibody and signal intensity from 5 randomly  
144 selected areas was quantified using ImageJ. Scale bar, 30  $\mu$ m. Data in (A-D)  
145 represent mean  $\pm$  SEM. In (B) and (D), ns, not significant, according to two tailed,  
146 unpaired Student's t-test. (E, F) Fixed cells were stained for (E) HA-nsp3 and LC3, or  
147 (F) HA-nsp3 and LAMP1. The boxed area in the overview panel in the right indicates  
148 the magnified region that is displayed in the other panels. Scale bars in the overview  
149 and enlarged section represent 10  $\mu$ m and 2  $\mu$ m, respectively. The degrees of  
150 colocalization between HA-nsp3 and LC3, or LAMP1 and LC3, were quantified by  
151 determining Pearson's correlation coefficients. Analyses are based on at least 20  
152 cells per condition. Data in (E) and (F) represent mean  $\pm$  SEM from two independent  
153 experiments. ns, not significant, according to two tailed, unpaired Student's t-test.  
154

155 **Table S1. Oligonucleotides.** Related to STAR METHODS.

156

| Oligonucleotide name: Sequence                                              | Source                    | Identifier |
|-----------------------------------------------------------------------------|---------------------------|------------|
| siRNA: NT Control                                                           | Life Technologies         | 4390846    |
| siRNA: VPS34 #1:<br>GCUUAGACCUGUCGGAUGATT                                   | Life Technologies         | s10519     |
| siRNA: VPS34 #2:<br>GCAUGGAGAUGAUUUACGUTT                                   | Life Technologies         | s10518     |
| siRNA: Beclin 1 #1:<br>CAGUUACAGAUGGAGCUUAATT                               | Life Technologies         | s16537     |
| siRNA: Beclin 1 #2:<br>CAGAUACUCUUUUAGACCATT                                | Life Technologies         | s16539     |
| siRNA: DFCP1 #1:<br>GGAUGGGUCUCGCAAAAUATT                                   | Life Technologies         | s28712     |
| siRNA: DFCP1 #2:<br>GGAUGUAAGAAAAGCAUGATT                                   | Life Technologies         | s28713     |
| PCR primer: GFP-DFCP1_BamHI_F:<br>AAAAGGATCCGCCACCATGGTGAGCAA<br>GGGCGAG    | Merck, Darmstadt, Germany | N/A        |
| PCR primer: GFP-DFCP1_NotI_R:<br>AAAAGCGGCCGCTTAAAGGTCACCGGG<br>CTTTTTATTG  | Merck, Darmstadt, Germany | N/A        |
| PCR primer: DFCP1_FYVE*1_F:<br>AGTCGGTGTCCGAGCTTAGCCTTGAC<br>CCACCAAGG      | Merck, Darmstadt, Germany | N/A        |
| PCR primer: DFCP1_FYVE*1_R:<br>CCTGGCTTCGTAGCTGTTGTCACAGAC                  | Merck, Darmstadt, Germany | N/A        |
| PCR primer: DFCP1_FYVE*2_F:<br>TGACAACAGCTACGAAGCCAGGAACG                   | Merck, Darmstadt, Germany | N/A        |
| PCR primer: DFCP1_FYVE*2_R:<br>TGCGGCCGCTTAAAGGTCACCGGGCTT<br>TTTATTGCTGTTG | Merck, Darmstadt, Germany | N/A        |
| PCR primer: piRO_SARS2_F:<br>CACCTGATAATCTAGATAAGCACCAATC<br>TTAGTGTTG      | Merck, Darmstadt, Germany | N/A        |
| PCR primer: piRO_SARS2_R:<br>TGGCACGCGTGAATTCGGGCCCGGGAT<br>TTTCCT          | Merck, Darmstadt, Germany | N/A        |

157
